# Supplementary material
Source: PubMed Central journal article supplement (PMC4813327)
Supplement: NIHMS765996-supplement-8.pdf [file NIHMS765996-supplement-8.pdf]

**Table S1: 3D landmarks**

| <i>Type</i> | <i>Region</i> | <i>#</i> | <i>Description</i>                                                         |
|-------------|---------------|----------|----------------------------------------------------------------------------|
| Bilateral   | Cranium       | 1        | Frontotemporale                                                            |
| Bilateral   | Cranium       | 2        | Superior midpoint of the orbit                                             |
| Bilateral   | Cranium       | 3        | Supero-medial margin of the orbit                                          |
| Bilateral   | Cranium       | 4        | Frontomalare temporale                                                     |
| Bilateral   | Cranium       | 5        | Ectoconchion                                                               |
| Bilateral   | Cranium       | 6        | Infero-medial margin of the orbit                                          |
| Bilateral   | Cranium       | 7        | Lateral margin of the nasal aperture                                       |
| Bilateral   | Cranium       | 8        | Supero-most point posterior to Frontomalare temporale                      |
| Bilateral   | Cranium       | 9        | Infero-lateral margin of the orbit                                         |
| Bilateral   | Cranium       | 10       | Inferior midpoint of the orbit                                             |
| Bilateral   | Cranium       | 11       | Infraorbital foramen                                                       |
| Bilateral   | Cranium       | 12       | Alare                                                                      |
| Bilateral   | Cranium       | 13       | Location above auricular where temporal portion of zygomatic meets cranium |
| Bilateral   | Cranium       | 14       | Zygonion                                                                   |
| Bilateral   | Cranium       | 15       | Jugal point of zygomatic                                                   |
| Bilateral   | Cranium       | 16       | Midpoint between (10) and (23)                                             |
| Bilateral   | Cranium       | 17       | Midpoint between (12) and (27)                                             |
| Bilateral   | Cranium       | 18       | Auricular                                                                  |
| Bilateral   | Cranium       | 19       | Zygomatic just anterior to condylar junction                               |
| Bilateral   | Cranium       | 20       | Midpoint between (19) and (21)                                             |
| Bilateral   | Cranium       | 21       | Inferior of zygomatic directly below (15)                                  |
| Bilateral   | Cranium       | 22       | Zygomaxillare                                                              |
| Bilateral   | Cranium       | 23       | Midpoint between (22) and (24)                                             |
| Bilateral   | Cranium       | 24       | Inferolateral juncture of zygomatic with maxilla                           |
| Bilateral   | Cranium       | 25       | Alveolar above M2                                                          |
| Bilateral   | Cranium       | 26       | Alveolar above M1                                                          |
| Bilateral   | Cranium       | 27       | Alveolar between premolars                                                 |
| Bilateral   | Cranium       | 28       | Alveolar above canine                                                      |
| Bilateral   | Mandible      | 1        | Condylion laterale                                                         |
| Bilateral   | Mandible      | 2        | Junction of ramus at condyle (anterior)                                    |
| Bilateral   | Mandible      | 3        | Condylion mediale                                                          |
| Bilateral   | Mandible      | 4        | Midpoint between (2) and (5)                                               |
| Bilateral   | Mandible      | 5        | Mandibular notch                                                           |
| Bilateral   | Mandible      | 6        | Midpoint between (5) and (7)                                               |
| Bilateral   | Mandible      | 7        | Coronion                                                                   |
| Bilateral   | Mandible      | 8        | Anterior complement to (6)                                                 |
| Bilateral   | Mandible      | 9        | Midpoint between (1) and (12)                                              |
| Bilateral   | Mandible      | 10       | Midpoint between (9) and (11)                                              |
| Bilateral   | Mandible      | 11       | Midpoint between (8) and (13)                                              |
| Bilateral   | Mandible      | 12       | Gonion                                                                     |
| Bilateral   | Mandible      | 13       | Distal extent of anterior edge of ramus                                    |
| Bilateral   | Mandible      | 14       | Postero-most inferior edge of mandible                                     |
| Bilateral   | Mandible      | 15       | Alveolar below M2                                                          |
| Bilateral   | Mandible      | 16       | Lateral extent below (13)                                                  |
| Bilateral   | Mandible      | 17       | Alveolar below M1                                                          |
| Bilateral   | Mandible      | 18       | Alveolar below P4                                                          |

|           |          |    |                                                                                      |
|-----------|----------|----|--------------------------------------------------------------------------------------|
| Bilateral | Mandible | 19 | Alveolar below P3                                                                    |
| Bilateral | Mandible | 20 | Laterale infradentale                                                                |
| Bilateral | Mandible | 21 | Alveolar below lateral and medial incisor                                            |
| Bilateral | Mandible | 22 | Mental foramen                                                                       |
| Bilateral | Mandible | 23 | Lateral extent of mandible below (22)                                                |
| Bilateral | Mandible | 24 | Lateral extent of the mental eminence                                                |
| Midline   | Cranium  | 1  | Depression above glabella on frontal at top of browridge                             |
| Midline   | Cranium  | 2  | Glabella                                                                             |
| Midline   | Cranium  | 3  | Nasion                                                                               |
| Midline   | Cranium  | 4  | Distal extent of nasal                                                               |
| Midline   | Cranium  | 5  | Akanthion                                                                            |
| Midline   | Cranium  | 6  | Midpoint between akanthion and prosthion                                             |
| Midline   | Cranium  | 7  | Prosthion                                                                            |
| Midline   | Mandible | 8  | Infradentale                                                                         |
| Midline   | Mandible | 9  | Pogonion                                                                             |
| Midline   | Mandible | 10 | Gnathion                                                                             |
| Bilateral | Face     | 1  | Tragus of the ear                                                                    |
| Bilateral | Face     | 2  | Outer canthus of eye                                                                 |
| Bilateral | Face     | 3  | Inner canthus of the eye                                                             |
| Bilateral | Face     | 4  | Cheek                                                                                |
| Bilateral | Face     | 5  | The most superior point at the junction between alar wing and face                   |
| Bilateral | Face     | 6  | The most posterolateral point at the junction between alar wing and face             |
| Bilateral | Face     | 7  | The most lateral point on the nasal alar crest                                       |
| Bilateral | Face     | 8  | Edge of nasal ala where cartilage of the nose inserts the tissue above the upper lip |
| Bilateral | Face     | 9  | Cheilion                                                                             |
| Bilateral | Face     | 10 | Upper lip at philtrum                                                                |
| Midline   | Face     | 1  | Glabella                                                                             |
| Midline   | Face     | 2  | Pronasale (tip of nose)                                                              |
| Midline   | Face     | 3  | Subnasale (base of nose)                                                             |
| Midline   | Face     | 4  | Labiale superius                                                                     |
| Midline   | Face     | 5  | Middle of lip                                                                        |
| Midline   | Face     | 6  | Labiale inferius                                                                     |
| Midline   | Face     | 7  | Midpoint between Face Midline 6 and Face Midline 8                                   |
| Midline   | Face     | 8  | Mental eminence                                                                      |
| Midline   | Face     | 9  | Gnathion                                                                             |
