# Supplementary material
Source: PubMed Central journal article supplement (PMC4813327)
Supplement: NIHMS765996-supplement-9.pdf [file NIHMS765996-supplement-9.pdf]

**Table S2: Partial Least Squares (PLS) Analysis of Shape**

| <u>PLS Axis</u> | <u>Singular Value</u> | <u>P-value</u> | <u>% Total Covariation</u> | <u>Correlation</u> | <u>P-value</u> |
|-----------------|-----------------------|----------------|----------------------------|--------------------|----------------|
| 1               | 0.0007                | <.0001         | 45.7                       | 0.92               | <.0001         |
| 2               | 0.0006                | <.0001         | 25.3                       | 0.83               | <.0001         |
| 3               | 0.0004                | <.0001         | 13.1                       | 0.82               | <.0001         |
| 4               | 0.0003                | <.0001         | 6.6                        | 0.72               | <.0001         |
| 5               | 0.0002                | <.0001         | 2.7                        | 0.74               | <.0001         |
| 6               | 0.0002                | <.0001         | 2.0                        | 0.56               | <.0001         |
| 7               | 0.0001                | <.0001         | 0.8                        | 0.69               | <.0001         |
| 8               | 0.0001                | <.0001         | 0.7                        | 0.65               | <.0001         |
| 9               | 0.0001                | <.0001         | 0.6                        | 0.62               | <.0001         |
